# Supplementary material
Source: PubMed Central journal article supplement (PMC7457918)
Supplement: mmc2.pdf [file mmc2.pdf]

Supplementary Table 3. Quality and bias evaluation of the studies included in the systematic review.

|                   | Author COI (author has company affiliation) | Non-cohort design | Non-Random or non-consecutive enrollment or selection | Inclusion/Exclusion criteria cause bias | Symptomatic status not reported | Pt demographics not reported | Ref Standard is not the same for all pts <sup>†</sup> | Accuracy of reference standard is poor or unclear <sup>†</sup> | Duration of symptoms at ref standard or index not described | Ref standard & index test are not simultaneous or w/i a few days <sup>†</sup> | Threshold to determine positive test is not pre-specified <sup>†</sup> | Test performance calculations performed on no. samples, not no. of pts | Calculations included indeterminate results | Calculations included invalid results | Researchers not blinded to ref standard or index test results |
|-------------------|---------------------------------------------|-------------------|-------------------------------------------------------|-----------------------------------------|---------------------------------|------------------------------|-------------------------------------------------------|----------------------------------------------------------------|-------------------------------------------------------------|-------------------------------------------------------------------------------|------------------------------------------------------------------------|------------------------------------------------------------------------|---------------------------------------------|---------------------------------------|---------------------------------------------------------------|
| Ai et al          |                                             |                   | nr                                                    |                                         |                                 |                              | nr                                                    |                                                                |                                                             | nr                                                                            | nr                                                                     |                                                                        | nr                                          | nr                                    |                                                               |
| Liu et al         |                                             |                   | nr                                                    |                                         |                                 |                              | nr                                                    |                                                                |                                                             | nr                                                                            | nr                                                                     |                                                                        | nr                                          | nr                                    |                                                               |
| Xie et al         |                                             |                   | nr                                                    |                                         |                                 |                              | nr                                                    |                                                                |                                                             | nr                                                                            | nr                                                                     |                                                                        | nr                                          | nr                                    |                                                               |
| Green et al       |                                             |                   |                                                       |                                         |                                 |                              |                                                       |                                                                |                                                             |                                                                               | nr                                                                     |                                                                        |                                             |                                       |                                                               |
| He et al          |                                             |                   | nr                                                    |                                         |                                 |                              |                                                       |                                                                |                                                             |                                                                               | nr                                                                     |                                                                        | nr                                          | nr                                    |                                                               |
| Bernheim et al    |                                             |                   | nr                                                    |                                         |                                 |                              |                                                       |                                                                |                                                             | nr                                                                            | nr                                                                     |                                                                        | nr                                          | nr                                    |                                                               |
| Fang et al        |                                             |                   |                                                       |                                         |                                 |                              |                                                       |                                                                |                                                             | nr                                                                            | nr                                                                     |                                                                        | nr                                          | nr                                    |                                                               |
| Lee et al         |                                             |                   | nr                                                    |                                         |                                 |                              |                                                       |                                                                |                                                             |                                                                               | nr                                                                     |                                                                        | nr                                          | nr                                    |                                                               |
| Long et al        |                                             |                   | nr                                                    |                                         |                                 |                              |                                                       |                                                                |                                                             |                                                                               | nr                                                                     |                                                                        | nr                                          | nr                                    |                                                               |
| Wong et al        |                                             |                   |                                                       |                                         |                                 |                              |                                                       |                                                                | nr                                                          | nr                                                                            | nr                                                                     |                                                                        | nr                                          | nr                                    |                                                               |
| Wu et al          |                                             |                   | nr                                                    |                                         |                                 |                              |                                                       |                                                                |                                                             |                                                                               | nr                                                                     |                                                                        | nr                                          | nr                                    |                                                               |
| Cradic et al      |                                             |                   |                                                       |                                         |                                 |                              |                                                       |                                                                |                                                             |                                                                               |                                                                        |                                                                        | nr                                          | nr                                    |                                                               |
| Suo et al         |                                             |                   | nr                                                    | nr                                      |                                 |                              |                                                       |                                                                |                                                             |                                                                               | nr                                                                     |                                                                        | nr                                          | nr                                    |                                                               |
| Zhen et al        |                                             |                   | nr                                                    |                                         |                                 |                              |                                                       |                                                                |                                                             |                                                                               |                                                                        |                                                                        | nr                                          | nr                                    |                                                               |
| Li et al          |                                             |                   | nr                                                    |                                         |                                 |                              |                                                       |                                                                |                                                             |                                                                               |                                                                        |                                                                        | nr                                          | nr                                    | nr                                                            |
| Bulterys et al    |                                             |                   | nr                                                    |                                         |                                 |                              |                                                       |                                                                |                                                             |                                                                               |                                                                        |                                                                        |                                             |                                       |                                                               |
| Wang et al, CMI   |                                             |                   |                                                       |                                         |                                 |                              |                                                       |                                                                |                                                             |                                                                               | nr                                                                     |                                                                        |                                             |                                       |                                                               |
| Xue et al         |                                             |                   | nr                                                    | nr                                      |                                 |                              |                                                       |                                                                | nr                                                          | nr                                                                            |                                                                        |                                                                        | nr                                          | nr                                    | nr                                                            |
| Waggoner et al    |                                             |                   | nr                                                    | nr                                      |                                 |                              |                                                       |                                                                |                                                             |                                                                               |                                                                        |                                                                        |                                             |                                       | nr                                                            |
| Perchetti et al   |                                             |                   | nr                                                    | nr                                      |                                 |                              |                                                       |                                                                |                                                             |                                                                               |                                                                        |                                                                        |                                             |                                       |                                                               |
| Wang et al, AC    |                                             |                   | nr                                                    | nr                                      |                                 |                              |                                                       |                                                                |                                                             |                                                                               |                                                                        |                                                                        |                                             |                                       |                                                               |
| Kitagawa et al    |                                             |                   | nr                                                    |                                         |                                 |                              |                                                       |                                                                | nr                                                          | nr                                                                            |                                                                        |                                                                        | nr                                          | nr                                    | nr                                                            |
| Yan et al         |                                             |                   | nr                                                    | nr                                      |                                 |                              |                                                       |                                                                |                                                             |                                                                               |                                                                        |                                                                        | nr                                          | nr                                    |                                                               |
| Baek et al        |                                             |                   | nr                                                    | nr                                      |                                 |                              |                                                       |                                                                | nr                                                          |                                                                               |                                                                        |                                                                        | nr                                          | nr                                    | nr                                                            |
| Lu et al          |                                             |                   | nr                                                    | nr                                      |                                 |                              |                                                       |                                                                | nr                                                          |                                                                               |                                                                        |                                                                        | nr                                          | nr                                    | nr                                                            |
| Lau et al         |                                             |                   |                                                       | nr                                      |                                 | nr                           |                                                       |                                                                | nr                                                          | nr                                                                            |                                                                        |                                                                        | nr                                          | nr                                    |                                                               |
| Chen et al        |                                             |                   | nr                                                    | nr                                      |                                 |                              |                                                       |                                                                | nr                                                          |                                                                               |                                                                        |                                                                        |                                             |                                       | nr                                                            |
| Hogan et al JCV2  |                                             |                   | nr                                                    | nr                                      |                                 |                              |                                                       |                                                                | nr                                                          |                                                                               |                                                                        |                                                                        |                                             |                                       | nr                                                            |
| Lieberman et al   |                                             |                   |                                                       |                                         |                                 |                              |                                                       |                                                                |                                                             |                                                                               |                                                                        |                                                                        |                                             |                                       | nr                                                            |
| Loeffelholz et al |                                             |                   |                                                       | nr                                      |                                 |                              |                                                       |                                                                |                                                             |                                                                               |                                                                        |                                                                        |                                             |                                       | nr                                                            |
| Moore et al       |                                             |                   |                                                       | nr                                      |                                 |                              |                                                       |                                                                |                                                             |                                                                               |                                                                        |                                                                        |                                             |                                       | nr                                                            |
| Poljak et al      |                                             |                   | nr                                                    | nr                                      |                                 |                              |                                                       |                                                                |                                                             |                                                                               |                                                                        |                                                                        |                                             |                                       | nr                                                            |
| Pujadas et al     |                                             |                   | nr                                                    |                                         |                                 |                              |                                                       |                                                                |                                                             |                                                                               |                                                                        |                                                                        |                                             |                                       | nr                                                            |
| Rahman et al      |                                             |                   | nr                                                    |                                         |                                 |                              |                                                       |                                                                | nr                                                          |                                                                               |                                                                        |                                                                        |                                             |                                       | nr                                                            |
| Hou et al         |                                             |                   | nr                                                    | nr                                      |                                 |                              |                                                       |                                                                | nr                                                          |                                                                               |                                                                        |                                                                        | nr                                          | nr                                    | nr                                                            |
| Bordi et al       |                                             |                   |                                                       | nr                                      |                                 |                              |                                                       |                                                                |                                                             |                                                                               |                                                                        |                                                                        |                                             |                                       | nr                                                            |
| Degli-Angeli      |                                             |                   |                                                       | nr                                      |                                 |                              |                                                       |                                                                | nr                                                          |                                                                               |                                                                        |                                                                        |                                             |                                       | nr                                                            |
| Hogan et al JCM   |                                             |                   | nr                                                    | nr                                      |                                 |                              |                                                       |                                                                | nr                                                          |                                                                               |                                                                        |                                                                        |                                             |                                       | nr                                                            |
| Mitchell et al    |                                             |                   | nr                                                    | nr                                      |                                 |                              |                                                       |                                                                |                                                             |                                                                               |                                                                        |                                                                        | nr                                          | nr                                    | nr                                                            |
| Visseaux et al    |                                             |                   | nr                                                    | nr                                      |                                 |                              |                                                       |                                                                | nr                                                          |                                                                               |                                                                        |                                                                        | nr                                          | nr                                    | nr                                                            |
| Rhoads et al      |                                             |                   |                                                       |                                         |                                 |                              |                                                       |                                                                | nr                                                          |                                                                               |                                                                        |                                                                        |                                             |                                       | nr                                                            |
| Basu et al        |                                             | /                 | nr                                                    |                                         |                                 |                              |                                                       |                                                                | nr                                                          |                                                                               |                                                                        |                                                                        | nr                                          | nr                                    | nr                                                            |
| Craney et al      |                                             |                   |                                                       | nr                                      |                                 |                              |                                                       |                                                                |                                                             |                                                                               |                                                                        |                                                                        | nr                                          | nr                                    | nr                                                            |
| Harrington et al  |                                             |                   |                                                       |                                         |                                 |                              |                                                       |                                                                |                                                             |                                                                               |                                                                        |                                                                        | nr                                          | nr                                    | nr                                                            |
| Moran et al       |                                             |                   | nr                                                    | nr                                      |                                 |                              |                                                       |                                                                | nr                                                          |                                                                               |                                                                        |                                                                        | nr                                          | nr                                    | nr                                                            |
| Zhen et al        |                                             |                   | nr                                                    | nr                                      |                                 |                              |                                                       |                                                                |                                                             |                                                                               |                                                                        |                                                                        | nr                                          | nr                                    | nr                                                            |
| Hogan et al JCV1  |                                             |                   |                                                       | nr                                      |                                 |                              |                                                       |                                                                |                                                             |                                                                               |                                                                        |                                                                        | nr                                          | nr                                    | nr                                                            |
| Norz et al        |                                             |                   | nr                                                    | nr                                      |                                 |                              |                                                       |                                                                |                                                             |                                                                               |                                                                        |                                                                        |                                             |                                       | nr                                                            |
| Smithgall et al   |                                             |                   |                                                       | nr                                      |                                 |                              |                                                       |                                                                |                                                             |                                                                               |                                                                        |                                                                        |                                             |                                       | nr                                                            |

<sup>†</sup>For Table 6, "Ref Standard" is "Platform #1" and "Index Test" is "Platform #2. Abbreviations- no.: number, nr: not reported, pt: patient, Ref: reference, w/i: within. Box with diagonal slash indicates the study was partially cohort designed with an additional control group.
